# Supplementary material
Source: PubMed Central journal article supplement (PMC2891882)
Supplement: NIHMS86576-supplement-1_si_001.pdf [file NIHMS86576-supplement-1_si_001.pdf]

Supplemental Material:  
Thymine Dimer-Induced Structural Changes to the DNA Duplex  
Examined with Reactive Probes

Rumora, Kolodziejczak, Wagner, and Núñez

Supplemental Table 1: Thermodynamic Data for the ssDNA  $\rightleftharpoons$  dsDNA Equilibrium

|                                               | $T_m$<br>°C                         |                                     | $\Delta H$<br>kcal/mol                     |                                                 | $\Delta S$<br>cal/mol K                    |                                             | $\Delta G$ at 25°C<br>kcal/mol                |                                                |
|-----------------------------------------------|-------------------------------------|-------------------------------------|--------------------------------------------|-------------------------------------------------|--------------------------------------------|---------------------------------------------|-----------------------------------------------|------------------------------------------------|
|                                               | UV*                                 | cal†                                | UV                                         | cal                                             | UV                                         | cal                                         | UV                                            | cal                                            |
| 1-2                                           | 66.6<br>$\pm 0.5$                   | 66.9<br>$\pm 0.6$                   | -175<br>$\pm 5$                            | -150.0<br>$\pm 2.4$                             | -492<br>$\pm 15$                           | -474<br>$\pm 63$                            | -28.2<br>$\pm 0.5$                            | -8.8<br>$\pm 16.9$                             |
| 1TT-2                                         | 63.6<br>$\pm 0.2$                   | 63.0<br>$\pm 0.2$                   | -174<br>$\pm 20$                           | -133.2<br>$\pm 9.9$                             | -493<br>$\pm 58$                           | -420<br>$\pm 24$                            | -26.6<br>$\pm 2.1$                            | -8.2<br>$\pm 7.8$                              |
| Difference<br>due to T $\rightleftharpoons$ T | $\Delta T_m =$<br>-3.0 $\pm$<br>0.5 | $\Delta T_m =$<br>-3.9<br>$\pm 0.6$ | $\Delta\Delta H^\circ =$<br>+1<br>$\pm 20$ | $\Delta\Delta H^\circ =$<br>+16.8<br>$\pm 10.2$ | $\Delta\Delta S^\circ =$<br>-1<br>$\pm 60$ | $\Delta\Delta S^\circ =$<br>+54<br>$\pm 68$ | $\Delta\Delta G^\circ =$<br>+1.6<br>$\pm 2.2$ | $\Delta\Delta G^\circ =$<br>+0.6<br>$\pm 18.6$ |

\* 21  $\mu$ M DNA duplex

† 40  $\mu$ M DNA duplex
